# Supplementary material
Source: publisher site journal article supplement (https://www.dovepress.com/article/226619)
Supplement: Supplementary file 1 [file get_supplementary_file.php]

**Supplemental Table 1: Clinic-Level Intra-class Correlations (ICC) of Medication Self-Management Outcomes**

| **Medication Self-Management Outcome** | | **ICC** |
| --- | --- | --- |
| **Medications reconciled** | |  |
|  | Hypertension | 0.046 |
|  | All chronic condition medications | 0.123 |
|  | All medications | 0.161 |
| **Knowledge of medication indication** | |  |
|  | Hypertension | 0.043 |
|  | All chronic condition medications | 0.053 |
|  | All medications | 0.014 |
| **Understanding of medication instructions and dosing** | |  |
|  | Hypertension | 0.0005 |
|  | All chronic condition medications | 0.0002 |
|  | All medications | 0.021 |
| **Medication adherence, 4-day recall** | |  |
|  | Hypertension | 0.012 |
|  | All chronic condition medications | 0.032 |

**Supplemental Table 2: Adjusted Relationships of Medication Self-Management Outcomes by Health Literacy in Models that Include Income and Education***

|  | | **Likely Limited vs Adequate** | | **Possibly Limited vs Adequate** | | **Likely Limited vs Possibly Limited** | |
| --- | --- | --- | --- | --- | --- | --- | --- |
|  | | **Adjusted odd ratio (CI)** | **P** | **Adjusted odd ratio (CI)** | **P** | **Adjusted odd ratio (CI)** | **P** |
| **Medications reconciled** | |  |  |  |  |  |  |
|  | Hypertension | 0.53 (0.31, 0.91) | 0.021 | 0.97 (0.66, 1.45) | 0.89 | 0.81 (0.59, 1.12) | 0.21 |
|  | All chronic condition medications | 0.85 (0.52, 1.41) | 0.53 | 0.75 (0.47, 1.20) | 0.23 | 1.14 (0.75, 1.71) | 0.54 |
|  | All medications | 0.83 (0.39, 1.73) | 0.61 | 0.86 (0.44, 1.68) | 0.66 | 0.96 (0.52, 1.76) | 0.89 |
| **Knowledge of medication indication** | |  |  |  |  |  |  |
|  | Hypertension | 0.53 (0.29, 0.96) | 0.036 | 0.55 (0.31, 1.0) | 0.048 | 0.95 (0.63, 1.44) | 0.82 |
|  | All chronic condition medications | 0.53 (0.32, 0.88) | 0.014 | 0.56 (0.34, 0.91) | 0.020 | 0.96 (0.67, 1.36) | 0.80 |
|  | All medications | 0.43 (0.28, 0.64) | <0.0001 | 0.57 (0.38, 0.86) | 0.0007 | 0.74 (0.54, 1.02) | 0.065 |
| **Understanding of medication instructions and dosing** | |  |  |  |  |  |  |
|  | Hypertension | 0.49 (0.27, 0.87) | 0.016 | 0.68 (0.38, 1.23) | 0.20 | 0.72 (0.47, 1.10) | 0.13 |
|  | All chronic condition medications | 0.49 (0.30, 0.79) | 0.004 | 0.58 (0.35, 0.95) | 0.029 | 0.84 (0.59, 1.20) | 0.33 |
|  | All medications | 0.49 (0.31, 0.78) | 0.002 | 0.66 (0.42, 1.04) | 0.075 | 0.74 (0.53, 1.04) | 0.081 |
| **Medication adherence, 4-day recall** | |  |  |  |  |  |  |
|  | Hypertension | 1.17 (0.76, 1.79) | 0.48 | 1.15 (0.76, 1.74) | 0.51 | 1.02 (0.72, 1.44) | 0.93 |
|  | All chronic condition medications | 1.33 (0.88, 2.01) | 0.18 | 1.21 (0.81, 1.80) | 0.36 | 1.10 (0.80, 1.52) | 0.56 |

*Numbers do not always equal total number of participants in each arm in cases where no ACCESS record was available (medication reconciliation), no patient-reported medications could not be identified in the category, or due to non-response. CI: 95% confidence interval. All models use adequate health literacy category as the reference group. Models include income, education, age, sex, and number of medication as fixed effects and health center as random effects.
